# Supplementary figures and images for: CasExpress reveals widespread and diverse patterns of cell survival of caspase-3 activation during development in vivo
Source: eLife journal article supplement (doi:10.7554/elife.10936), 2016-04-08

Figure 2 - Figure Supplement 1

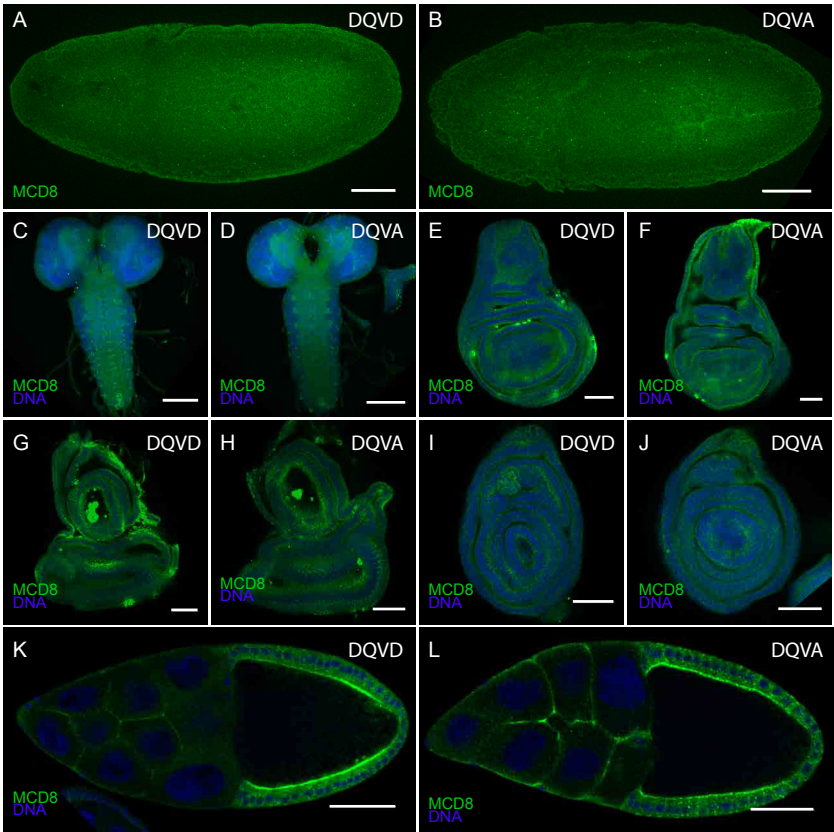

Supplement: supp [file elife_poa_e10936_Figure_2_figure_supplement_1.pdf › elife_poa_e10936_Figure_2_figure_supplement_1.pdf]

Figure 3 - figure supplement 1

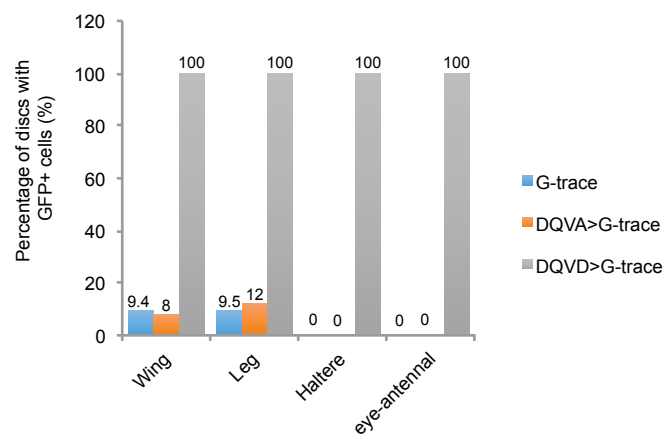

Supplement: supp [file elife_poa_e10936_Figure_3_figure_supplement_1.pdf › elife_poa_e10936_Figure_3_figure_supplement_1.pdf]

Figure 3 - Figure Supplement 2

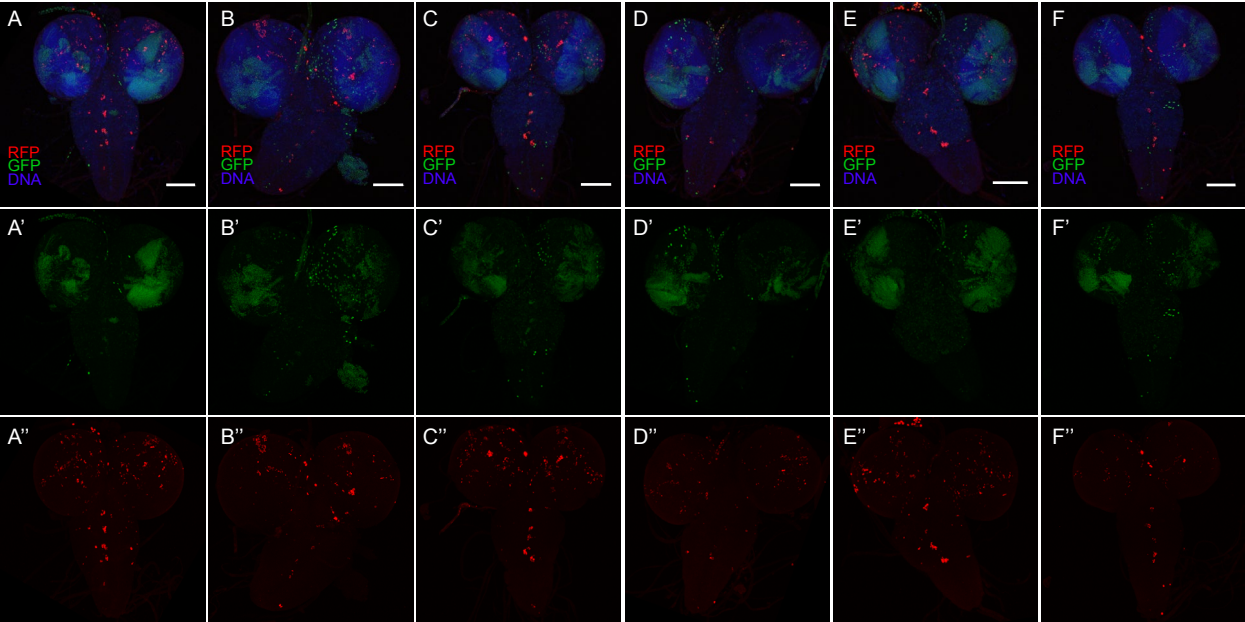

Supplement: supp [file elife_poa_e10936_Figure_3_figure_supplement_2.pdf › elife_poa_e10936_Figure_3_figure_supplement_2.pdf]

Figure 3 - Figure Supplement 3

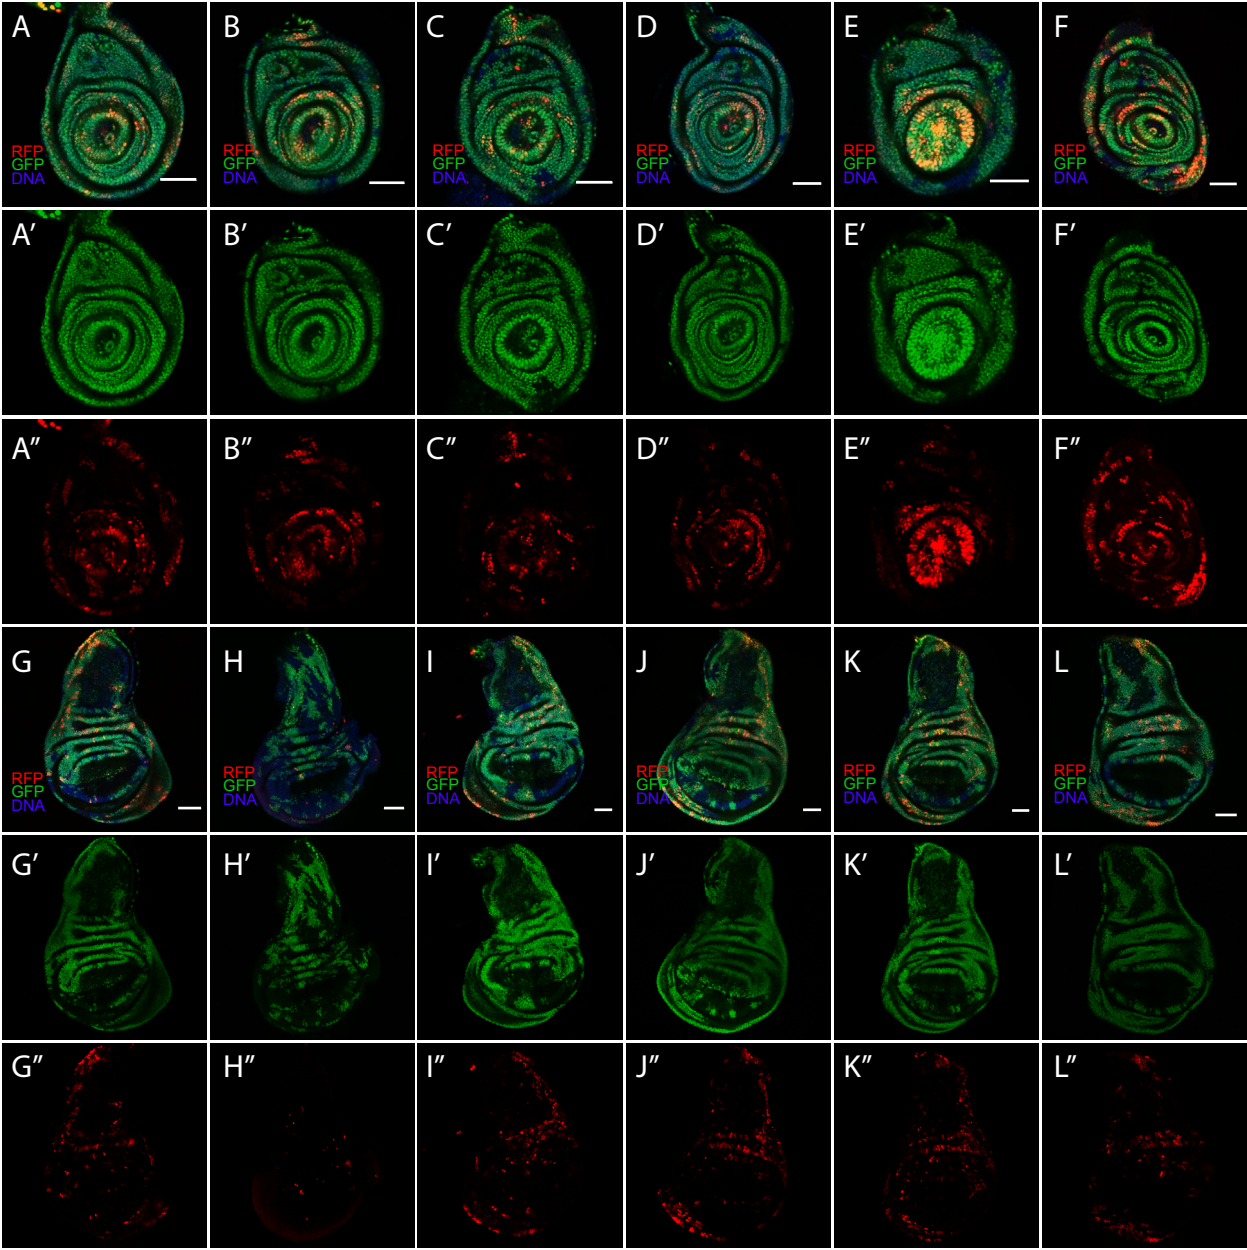

Supplement: supp [file elife_poa_e10936_Figure_3_figure_supplement_3.pdf › elife_poa_e10936_Figure_3_figure_supplement_3.pdf]

Figure 3 - Figure Supplement 4

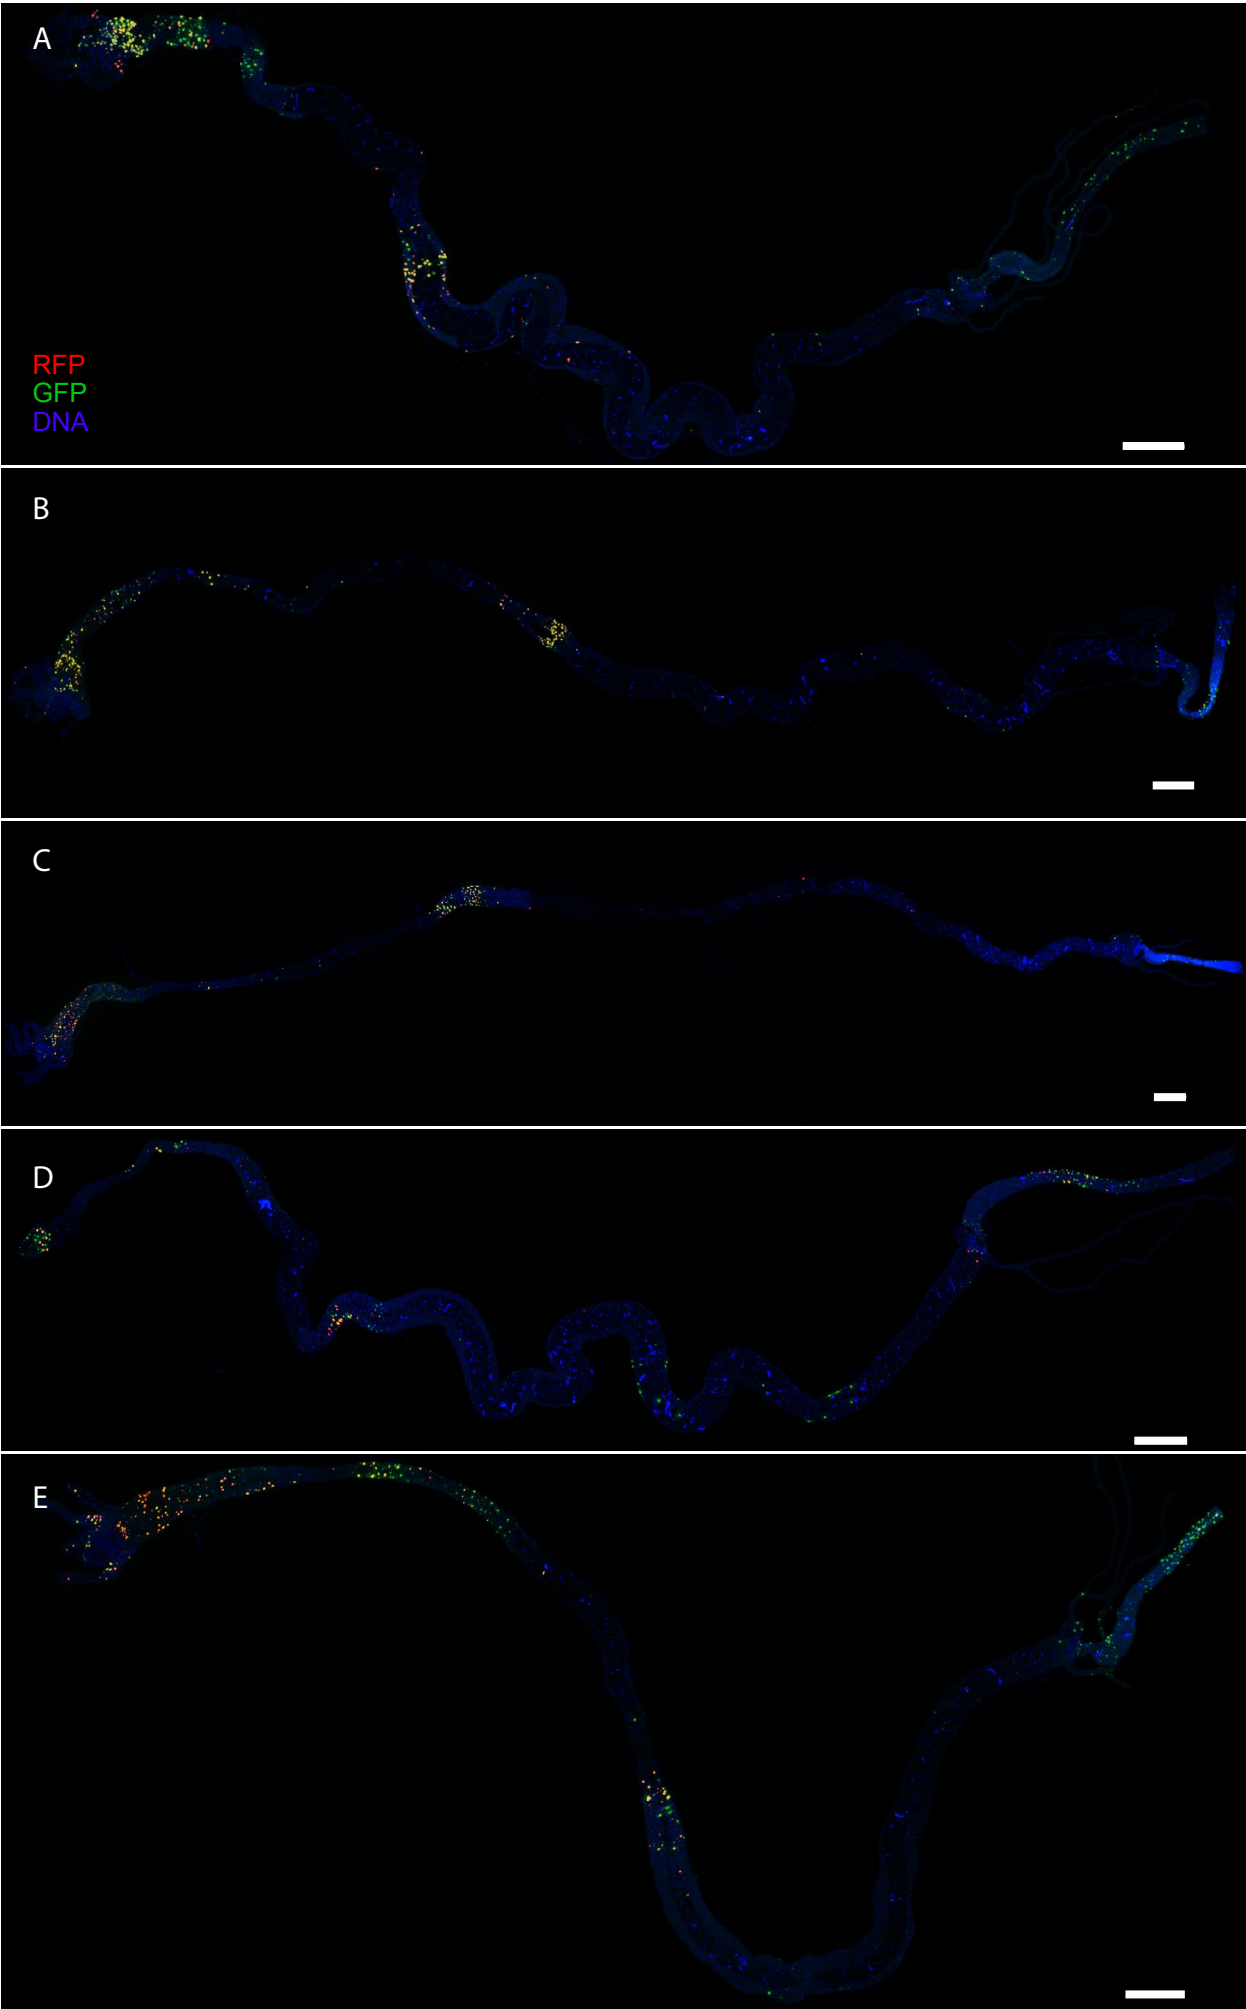

Supplement: supp [file elife_poa_e10936_Figure_3_figure_supplement_4.pdf › elife_poa_e10936_Figure_3_figure_supplement_4.pdf]

Figure 4 - Figure Supplement 1

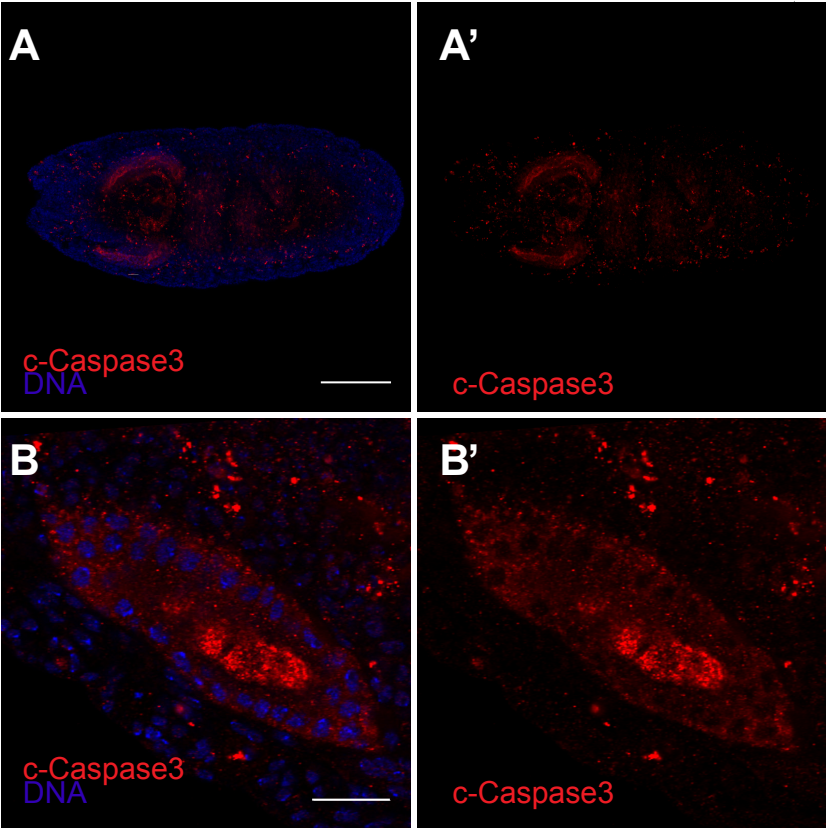

Supplement: supp [file elife_poa_e10936_Figure_4_figure_supplement_1.pdf › elife_poa_e10936_Figure_4_figure_supplement_1.pdf]

Figure 4 - Figure Supplement 2

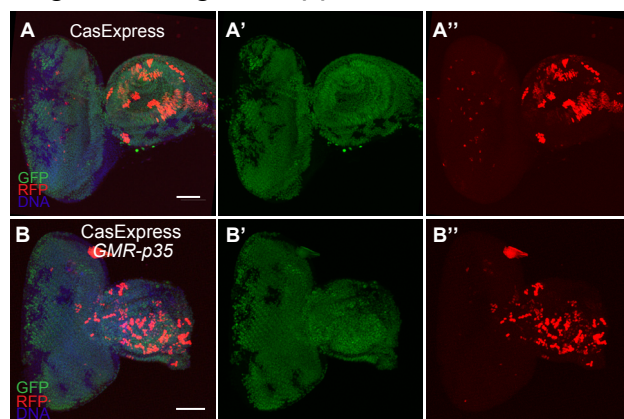

Supplement: supp [file elife_poa_e10936_Figure_4_figure_supplement_2.pdf › elife_poa_e10936_Figure_4_figure_supplement_2.pdf]

Figure 4 - Figure Supplement 3

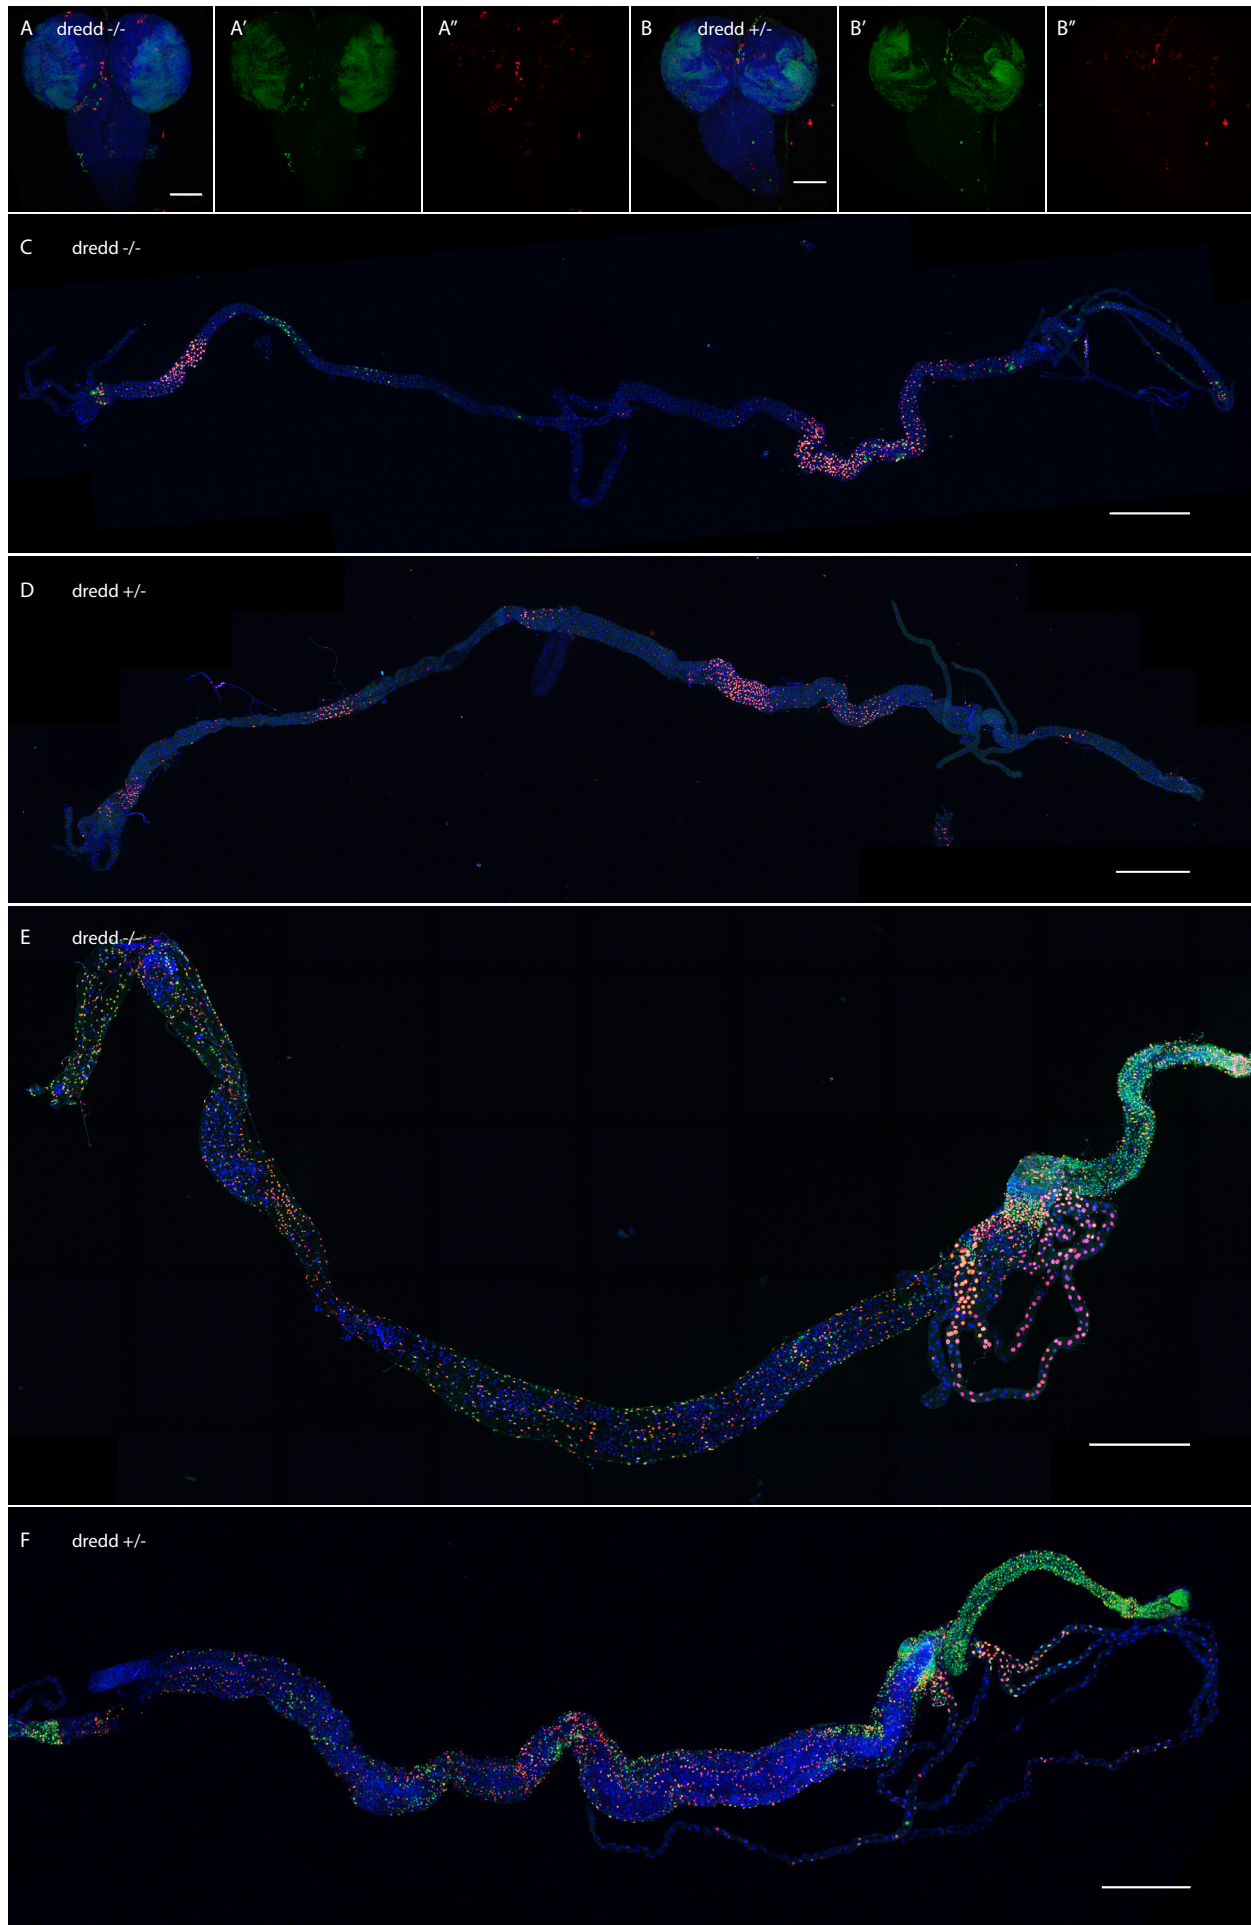

Supplement: supp [file elife_poa_e10936_Figure_4_figure_supplement_3.pdf › elife_poa_e10936_Figure_4_figure_supplement_3.pdf]

Figure 5 - figure supplement 1

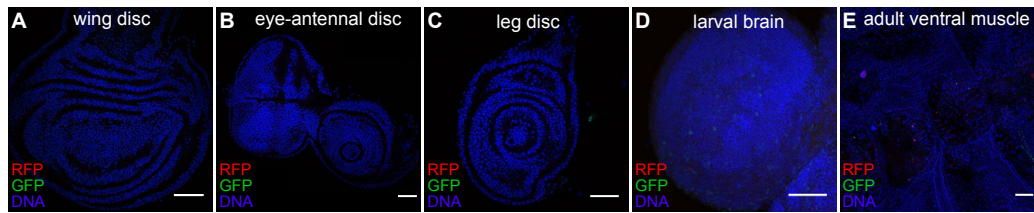

Supplement: supp [file elife_poa_e10936_Figure_5_figure_supplement_1.pdf › elife_poa_e10936_Figure_5_figure_supplement_1.pdf]

Figure 6 - Figure Supplement 1

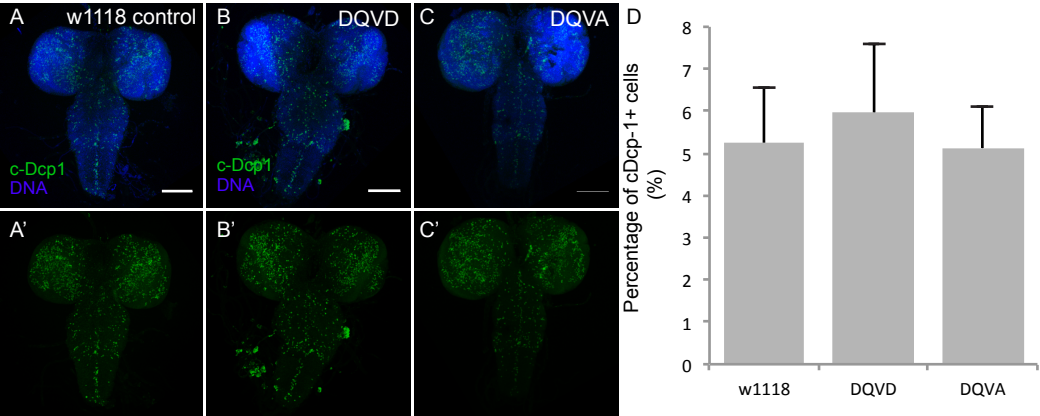

Supplement: supp [file elife_poa_e10936_Figure_6_figure_supplement_1.pdf › elife_poa_e10936_Figure_6_figure_supplement_1.pdf]
